# Supplementary material for: Spatial Heterogeneity of Cadmium Effects on Salvia sclarea Leaves Revealed by Chlorophyll Fluorescence Imaging Analysis and Laser Ablation Inductively Coupled Plasma Mass Spectrometry
Source: MDPI journal article supplement (doi:10.3390/ma12182953), 2019-09-12
Supplement: s1 [file s1]

# Spatial Heterogeneity of Cadmium Effects on *Salvia sclarea* Leaves Revealed by Chlorophyll Fluorescence Imaging Analysis and Laser Ablation Inductively Coupled Plasma Mass Spectrometry

Michael Moustakas <sup>1,\*</sup>, Anetta Hanć <sup>2</sup>, Anelia Dobrikova <sup>3</sup>, Ilektra Sperdouli <sup>4</sup>,  
Ioannis-Dimosthenis S. Adamakis <sup>5</sup> and Emilia Apostolova <sup>3</sup>

<sup>1</sup> Department of Botany, Aristotle University of Thessaloniki, 54124 Thessaloniki, Greece

<sup>2</sup> Department of Trace Element Analysis by Spectroscopy Method, Faculty of Chemistry, Adam Mickiewicz University, 61 614 Poznań, Poland

<sup>3</sup> Institute of Biophysics and Biomedical Engineering, Bulgarian Academy of Science, 1113 Sofia, Bulgaria

<sup>4</sup> Institute of Plant Breeding and Genetic Resources, Hellenic Agricultural Organization–Demeter, Thessaloniki, 57001 Thessaloniki, Greece

<sup>5</sup> Department of Botany, Faculty of Biology, National and Kapodistrian University of Athens, 157 84 Athens, Greece

\* Correspondence: moustak@bio.auth.gr; Tel.: +30-2310-99-8335

Received: 28 July 2019; Accepted: 09 September 2019; Published: 12 September 2019

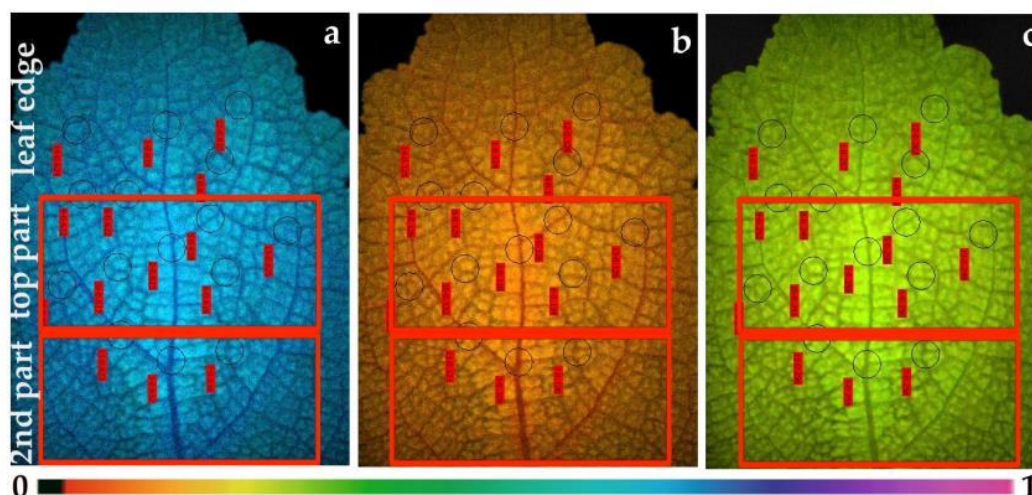

**Figure S1.** Representative chlorophyll fluorescence images of  $\Phi_{PSII}$  (a),  $\Phi_{NPQ}$  (b) and  $\Phi_{NO}$  (c) of *Salvia sclarea* leaves from plants grown under control conditions (0  $\mu$ M Cd). The different leaf areas: leaf edge, top leaf area, and 2<sup>nd</sup> leaf area, are marked. The color code depicted at the bottom of the images ranges from 0 to 1.

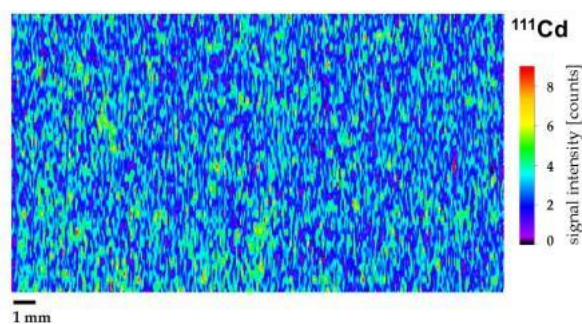

**Figure S2.** Laser ablation-inductively coupled plasma-mass spectrometry (LA-ICP-MS) Cd distribution of a *Salvia sclarea* leaf under control conditions (0  $\mu\text{M}$  Cd). Image is produced on the raw signal intensity.

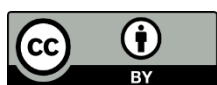

© 2019 by the authors. Submitted for possible open access publication under the terms and conditions of the Creative Commons Attribution (CC BY) license (<http://creativecommons.org/licenses/by/4.0/>).
